# Supplementary material for: Porous NiCo2O4nanotubes as a noble-metal-free effective bifunctional catalyst for rechargeable Li–O2batteries
Source: Royal Society of Chemistry journal article supplement (doi:10.1039/c5ta07856c), 2015-01-01
Supplement: c5ta07856c1.pdf [file c5ta07856c1.pdf]

## Supporting information

For

### **Porous NiCo<sub>2</sub>O<sub>4</sub> nanotubes as noble metal-free effective bifunctional catalysts for rechargeable Li–O<sub>2</sub> batteries**

Laiyang Li,<sup>a</sup> Laifa Shen,<sup>a</sup> Ping Nie,<sup>a</sup> Gang Pang,<sup>b</sup> Jie Wang,<sup>a</sup> Hongsen Li,<sup>a</sup> Shengyang Dong,<sup>a</sup> and Xiaogang Zhang<sup>\*a</sup>

<sup>a</sup> Jiangsu Key Laboratory of Materials and Technology for Energy Conversion, College of Materials Science and Engineering Nanjing University of Aeronautics and Astronautics Nanjing, 210016, P. R. China.

E-mail: [azhangxg@nuaa.edu.cn](mailto:azhangxg@nuaa.edu.cn)

<sup>b</sup> School of Materials Science and Engineering, Anhui University of Technology, Maanshan, 243002, P. R. China.

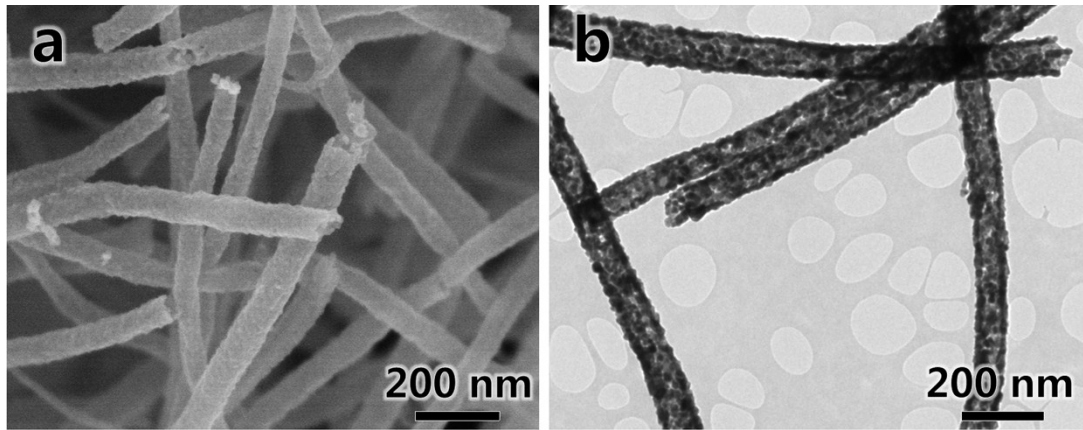

**Fig. S1.** FESEM (a) and TEM (b) images of porous NiCo<sub>2</sub>O<sub>4</sub> nanotubes

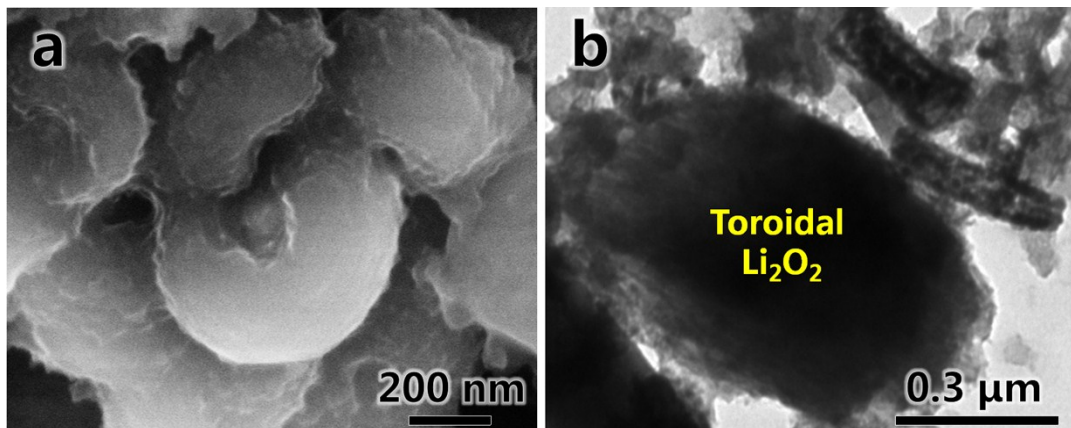

**Fig. S2.** FESEM (a) and TEM (b) images of the discharged NCO/CB electrodes

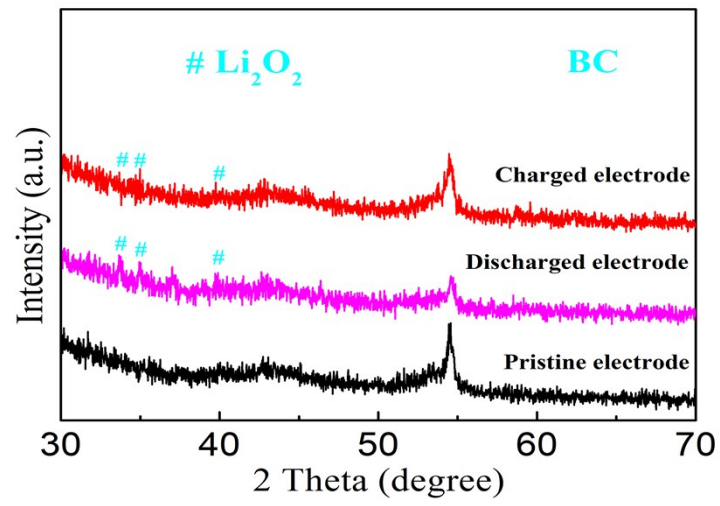

**Fig. S3.** XRD pattern of the CB electrode at different discharge/charge states.
